# Supplementary material for: Transition metal phosphonates with supramolecular structures: syntheses, structures, surface photovoltage and luminescence properties
Source: Royal Society of Chemistry journal article supplement (doi:10.1039/c5nj02417j), 2015-11-12
Supplement: c5nj02417j1.pdf [file c5nj02417j1.pdf]

## **Electronic Supplementary Material (ESI) for New Journal of Chemistry**

### **Electronic Supplementary Information (ESI)**

#### **Transition metal phosphonates with supramolecular structures: syntheses, structures, surface photovoltage and luminescent properties**

Yan–Yu Zhu, Mei–Ling Wang, Ming–Xue Ma, Zhen–Gang Sun,\* Cheng–Qi Jiao,  
Chao Ma and Huan–Yu Li

*School of Chemistry and Chemical Engineering, Liaoning Normal University, Dalian  
116029, P. R. China*

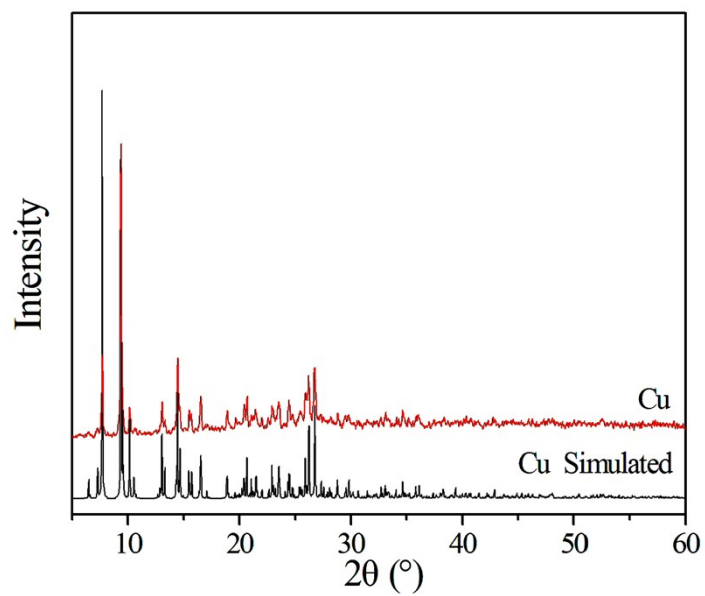

**Fig S1.** The experimental powder XRD pattern and the simulated XRD pattern of compound **1**.

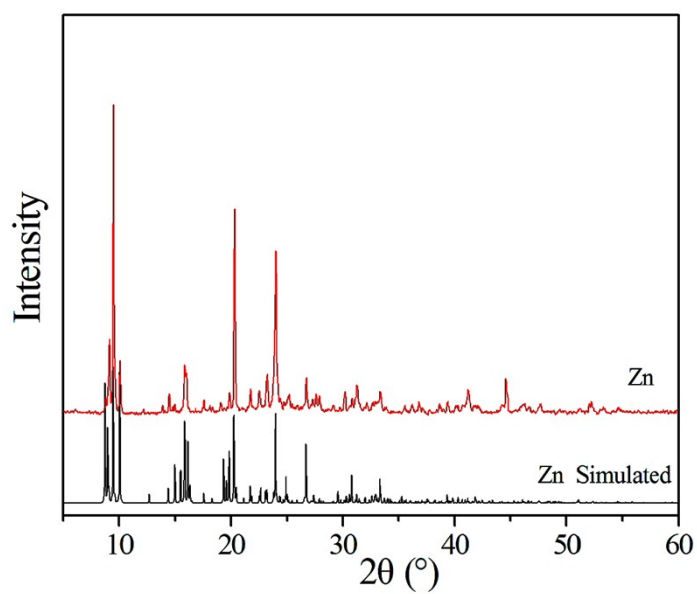

**Fig S2.** The experimental powder XRD pattern and the simulated XRD pattern of compound **2**.

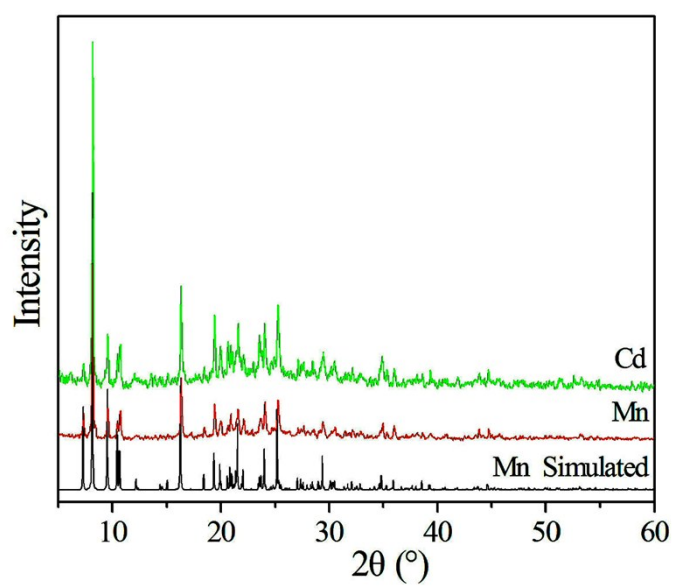

**Fig S3.** The simulated XRD pattern of compound **3** (down) and experimental powder XRD patterns of compounds **3** and **4**.

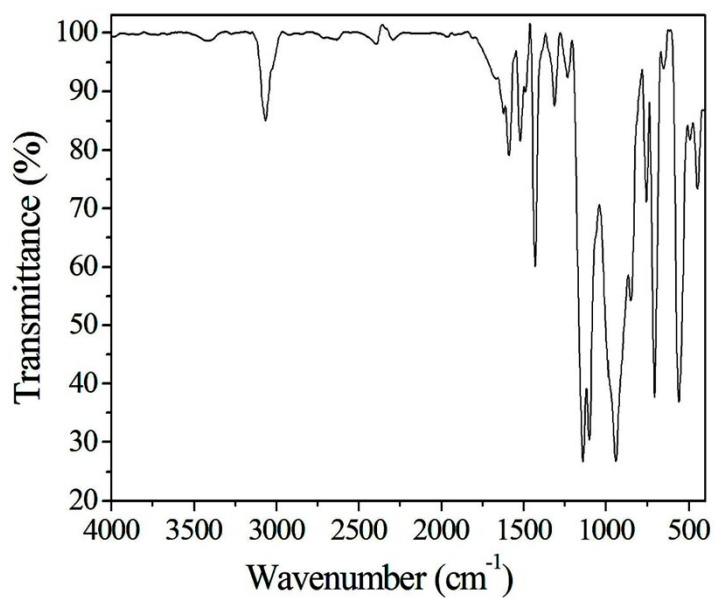

**Fig S4.** The IR spectrum of compound **1**.

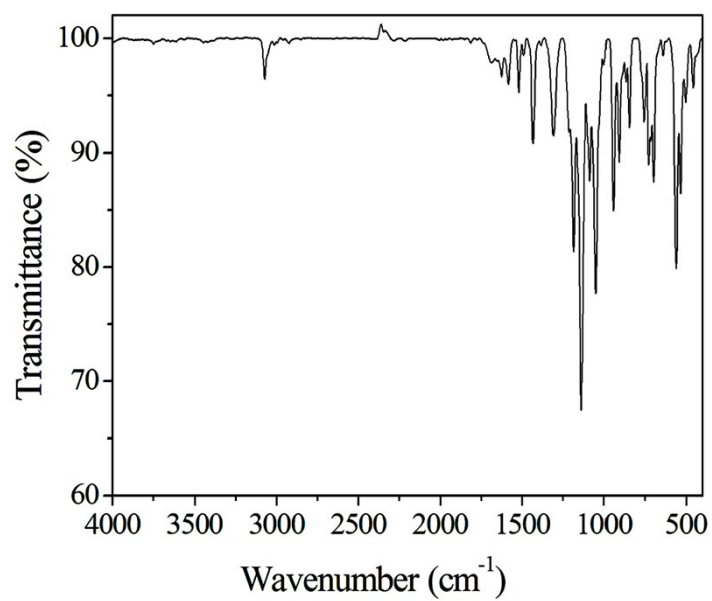

**Fig S5.** The IR spectrum of compound **2**.

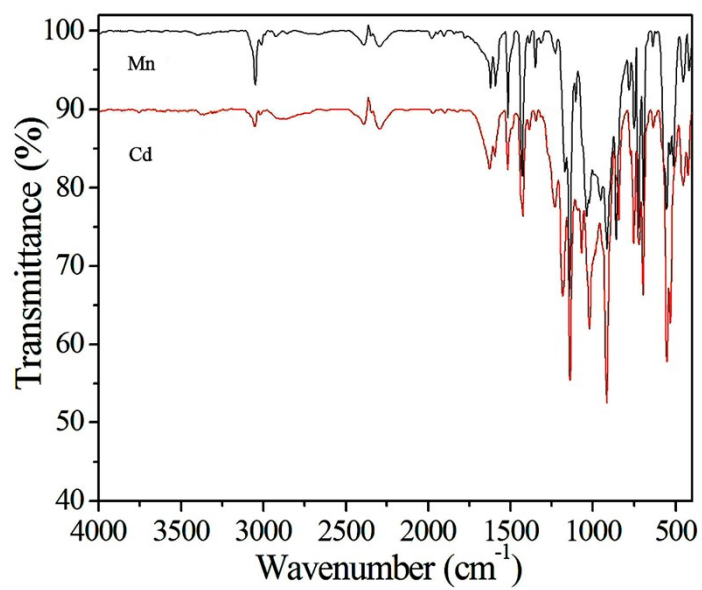

**Fig S6.** The IR spectra of compounds **3** and **4**.

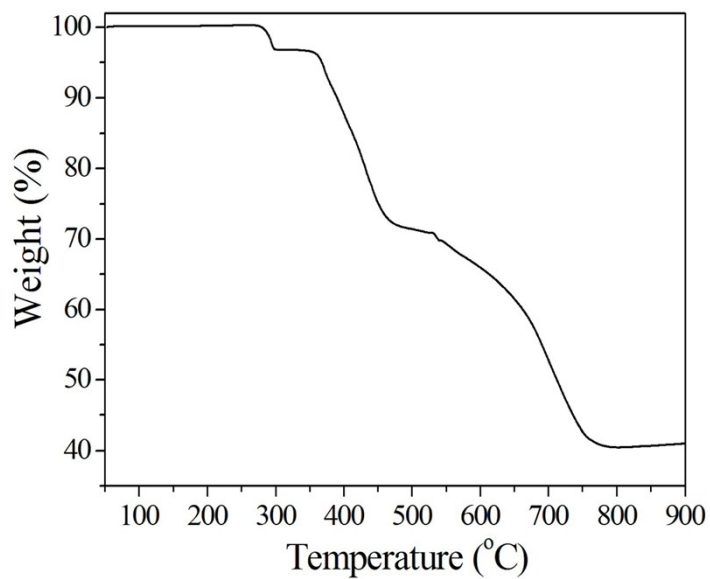

**Fig S7.** The TG curve of compound **1**.

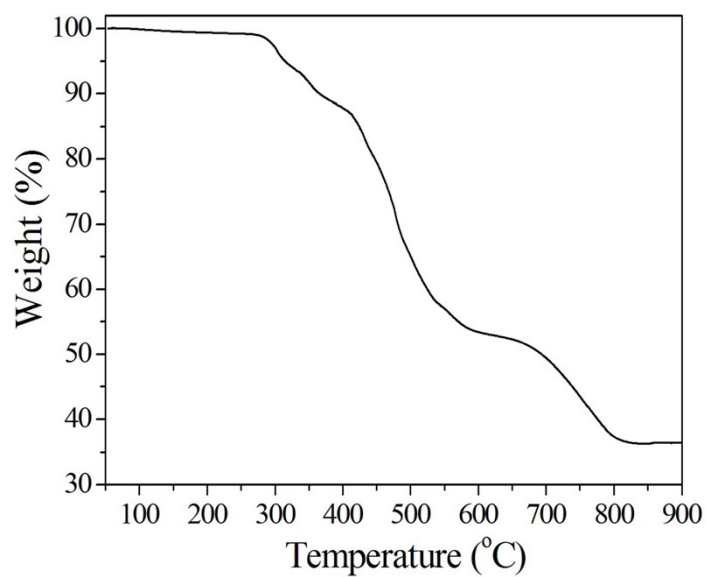

**Fig. S8.** The TG curve of compound **2**.

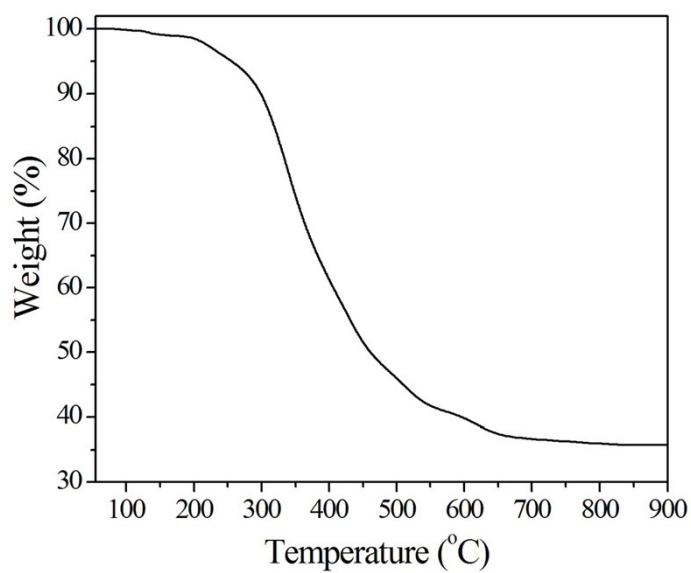

**Fig. S9.** The TG curve of compound **3**.

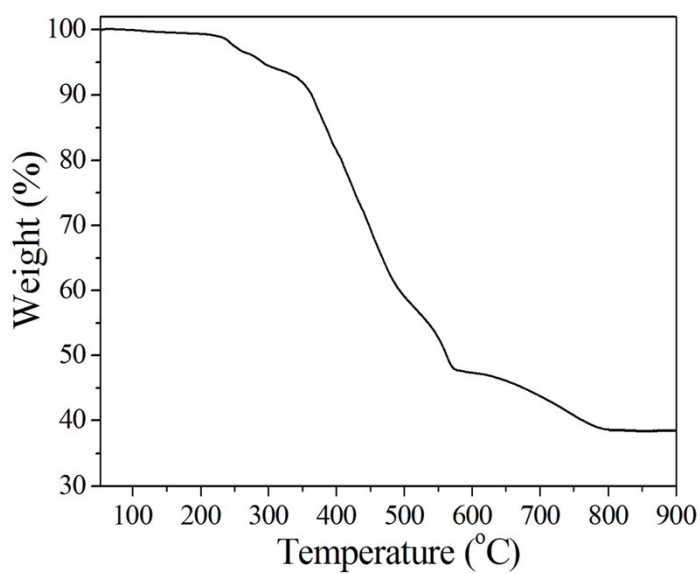

**Fig. S10.** The TG curve of compound **4**.

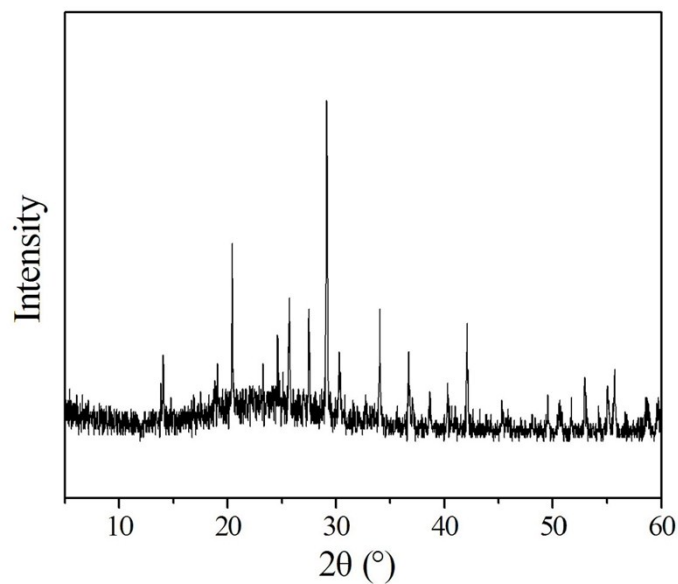

**Fig. S11.** The X-ray power diffraction pattern of the final product in the thermal decomposition for compound **3**. The final product is  $\text{Mn}(\text{PO}_3)_2$  (JCPDS 00-029-0892).

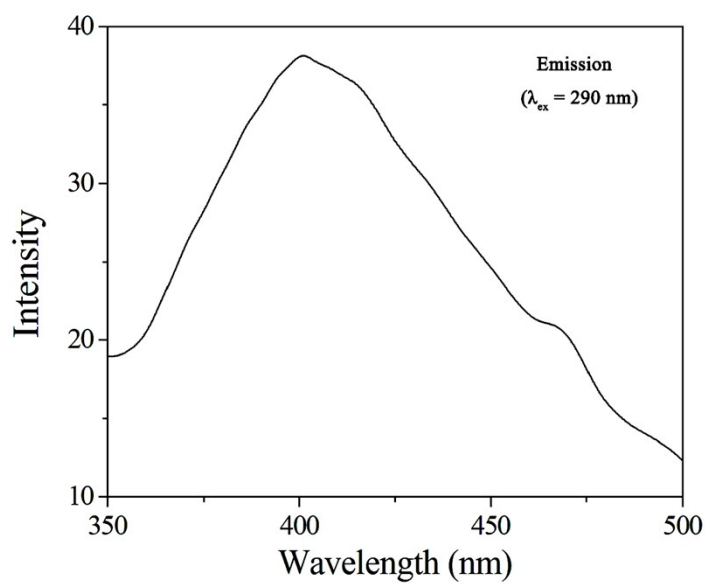

**Fig. S12.** Solid-state emission spectrum of phenylphosphonic acid ( $\text{H}_2\text{L}$ ) at room

temperature.

**Table S1** Selected bond lengths (Å) and angles (deg) for compound **1**

|                 |            |                 |            |
|-----------------|------------|-----------------|------------|
| Cu(1)–O(4)      | 1.907(2)   | P(2)–O(6)       | 1.512(3)   |
| Cu(1)–O(7)      | 1.994(2)   | P(2)–O(5)       | 1.552(3)   |
| Cu(1)–N(2)      | 1.999(3)   | P(2)–C(7)       | 1.794(4)   |
| Cu(1)–N(1)      | 2.016(3)   | P(3)–O(9)       | 1.519(3)   |
| Cu(1)–O(1)      | 2.286(2)   | P(3)–O(8)       | 1.517(3)   |
| Cu(2)–O(6)      | 1.935(2)   | P(3)–O(7)       | 1.529(3)   |
| Cu(2)–O(1)      | 1.976(2)   | P(3)–C(13)      | 1.804(4)   |
| Cu(2)–N(3)      | 2.001(3)   | P(4)–O(10)      | 1.496(10)  |
| Cu(2)–N(4)      | 2.027(3)   | P(4)–O(12)      | 1.494(8)   |
| Cu(2)–O(7)      | 2.296(2)   | P(4)–O(11)      | 1.559(11)  |
| P(1)–O(2)       | 1.495(3)   | P(4)–C(19)      | 1.814(6)   |
| P(1)–O(1)       | 1.541(2)   | P(4')–O(11')    | 1.513(14)  |
| P(1)–O(3)       | 1.545(3)   | P(4')–O(12')    | 1.513(11)  |
| P(1)–C(1)       | 1.795(4)   | P(4')–O(10')    | 1.540(15)  |
| P(2)–O(4)       | 1.507(3)   | P(4')–C(19)     | 1.834(8)   |
|                 |            |                 |            |
| N(2)–Cu(1)–N(1) | 81.15(13)  | O(6)–Cu(2)–O(1) | 95.13(10)  |
| O(4)–Cu(1)–O(1) | 91.51(10)  | O(6)–Cu(2)–N(3) | 90.11(11)  |
| O(7)–Cu(1)–O(1) | 80.50(9)   | O(1)–Cu(2)–N(3) | 169.69(11) |
| N(2)–Cu(1)–O(1) | 95.07(11)  | O(6)–Cu(2)–N(4) | 169.66(11) |
| N(1)–Cu(1)–O(1) | 114.93(10) | O(1)–Cu(2)–N(4) | 92.27(11)  |
| O(4)–Cu(1)–O(7) | 94.86(11)  | N(3)–Cu(2)–N(4) | 81.50(12)  |
| O(4)–Cu(1)–N(2) | 169.93(12) | O(6)–Cu(2)–O(7) | 93.21(10)  |
| O(7)–Cu(1)–N(2) | 93.74(12)  | O(1)–Cu(2)–O(7) | 80.64(9)   |
| O(4)–Cu(1)–N(1) | 89.17(12)  | N(3)–Cu(2)–O(7) | 107.98(10) |
| O(7)–Cu(1)–N(1) | 164.00(11) | N(4)–Cu(2)–O(7) | 95.11(10)  |



**Table S2** Selected bond lengths (Å) and angles (deg) for compound **2**

---

|                                                                               |            |                   |            |
|-------------------------------------------------------------------------------|------------|-------------------|------------|
| Zn(1)–O(4)                                                                    | 1.9599(13) | P(1)–O(3)         | 1.5774(13) |
| Zn(1)–O(6)#1                                                                  | 1.9860(13) | P(1)–C(1)         | 1.802(2)   |
| Zn(1)–O(1)                                                                    | 2.0326(13) | P(2)–O(6)         | 1.5009(13) |
| Zn(1)–N(1)                                                                    | 2.1241(16) | P(2)–O(4)         | 1.5070(14) |
| Zn(1)–N(2)                                                                    | 2.2143(16) | P(2)–O(5)         | 1.5625(13) |
| P(1)–O(1)                                                                     | 1.5014(13) | P(2)–C(7)         | 1.8015(19) |
| P(1)–O(2)                                                                     | 1.5076(14) |                   |            |
| <hr/>                                                                         |            |                   |            |
| O(4)–Zn(1)–O(6)#1                                                             | 119.78(6)  | O(1)–Zn(1)–N(1)   | 90.70(6)   |
| O(4)–Zn(1)–O(1)                                                               | 98.14(6)   | O(4)–Zn(1)–N(2)   | 99.93(6)   |
| O(6)#1–Zn(1)–O(1)                                                             | 93.24(5)   | O(6)#1–Zn(1)–N(2) | 85.03(6)   |
| O(4)–Zn(1)–N(1)                                                               | 106.51(6)  | O(1)–Zn(1)–N(2)   | 160.08(6)  |
| O(6)#1–Zn(1)–N(1)                                                             | 132.37(6)  | N(1)–Zn(1)–N(2)   | 76.19(6)   |
| Symmetry transformations used to generate equivalent atoms: #1 – x, – y, – z. |            |                   |            |

---

**Table S3** Selected bond lengths (Å) and angles (deg) for compounds **3** and **4**

| Compound 3        |            |                   |            |
|-------------------|------------|-------------------|------------|
| Mn(1)–O(7)        | 2.1163(13) | P(1)–C(1)         | 1.800(3)   |
| Mn(1)–O(1)        | 2.1682(14) | P(2)–O(5)         | 1.4974(15) |
| Mn(1)–O(4)        | 2.2123(13) | P(2)–O(4)         | 1.5283(13) |
| Mn(1)–O(4)#1      | 2.2188(13) | P(2)–O(6)         | 1.5665(15) |
| Mn(1)–N(1)        | 2.2837(16) | P(2)–C(7)         | 1.793(2)   |
| Mn(1)–N(2)        | 2.3551(17) | P(3)–O(7)         | 1.4869(14) |
| P(1)–O(2)         | 1.5065(15) | P(3)–O(8)         | 1.5356(17) |
| P(1)–O(1)         | 1.5112(14) | P(3)–O(9)         | 1.5623(16) |
| P(1)–O(3)         | 1.5682(16) | P(3)–C(13)        | 1.797(2)   |
| O(7)–Mn(1)–O(1)   | 88.37(6)   | O(4)–Mn(1)–N(1)   | 98.10(5)   |
| O(7)–Mn(1)–O(4)   | 88.02(5)   | O(4)#1–Mn(1)–N(1) | 93.23(5)   |
| O(1)–Mn(1)–O(4)   | 166.23(5)  | O(7)–Mn(1)–N(2)   | 99.64(6)   |
| O(7)–Mn(1)–O(4)#1 | 95.54(5)   | O(1)–Mn(1)–N(2)   | 93.56(6)   |
| O(1)–Mn(1)–O(4)#1 | 89.85(5)   | O(4)–Mn(1)–N(2)   | 100.14(5)  |
| O(4)–Mn(1)–O(4)#1 | 77.28(5)   | O(4)#1–Mn(1)–N(2) | 164.52(5)  |
| O(7)–Mn(1)–N(1)   | 170.24(6)  | N(1)–Mn(1)–N(2)   | 71.88(6)   |
| O(1)–Mn(1)–N(1)   | 87.38(6)   |                   |            |
| Compound 4        |            |                   |            |
| Cd(1)–O(7)        | 2.2265(19) | P(1)–C(1)         | 1.798(4)   |
| Cd(1)–O(1)        | 2.291(2)   | P(2)–O(5)         | 1.502(2)   |
| Cd(1)–O(4)        | 2.3050(19) | P(2)–O(4)         | 1.5181(19) |
| Cd(1)–O(4)#1      | 2.3225(17) | P(2)–O(6)         | 1.566(2)   |
| Cd(1)–N(1)        | 2.323(2)   | P(2)–C(7)         | 1.792(3)   |
| Cd(1)–N(2)        | 2.400(2)   | P(3)–O(7)         | 1.485(2)   |
| P(1)–O(2)         | 1.505(2)   | P(3)–O(8)         | 1.522(3)   |
| P(1)–O(1)         | 1.507(2)   | P(3)–O(9)         | 1.555(2)   |
| P(1)–O(3)         | 1.565(2)   | P(3)–C(13)        | 1.805(4)   |
| O(7)–Cd(1)–O(1)   | 87.86(8)   | O(4)–Cd(1)–N(1)   | 99.16(7)   |
| O(7)–Cd(1)–O(4)   | 85.11(7)   | O(4)#1–Cd(1)–N(1) | 92.92(7)   |
| O(1)–Cd(1)–O(4)   | 160.27(7)  | O(7)–Cd(1)–N(2)   | 102.73(8)  |
| O(7)–Cd(1)–O(4)#1 | 93.25(7)   | O(1)–Cd(1)–N(2)   | 96.02(8)   |
| O(1)–Cd(1)–O(4)#1 | 85.96(7)   | O(4)–Cd(1)–N(2)   | 103.50(7)  |
| O(4)–Cd(1)–O(4)#1 | 76.07(7)   | O(4)#1–Cd(1)–N(2) | 163.95(7)  |
| O(7)–Cd(1)–N(1)   | 173.19(8)  | N(1)–Cd(1)–N(2)   | 71.20(8)   |

O(1)–Cd(1)–N(1)      89.72(8)

Symmetry transformations used to generate equivalent atoms: #1  $-x, -y + 2, -z$ .

---
